# Supplementary material for: Detection of phase-dependent transcriptomic changes and Rubisco-mediated CO2 fixation into poly (3-hydroxybutyrate) under heterotrophic condition in Ralstonia eutropha H16 based on RNA-seq and gene deletion analyses
Source: PubMed Central journal article supplement (PMC3734047; doi:10.1186/1471-2180-13-169), 2013-07-23
Supplement: 1471-2180-13-169-S1.pdf [file 1471-2180-13-169-S1.pdf]

**Detection of phase-dependent transcriptomic changes and Rubisco-mediated CO<sub>2</sub> fixation into poly(3-hydroxybutyrate) under heterotrophic condition in *Ralstonia eutropha* H16 based on RNA-seq and gene deletion analyses (Shimizu et al.)**

**Supplementary information**

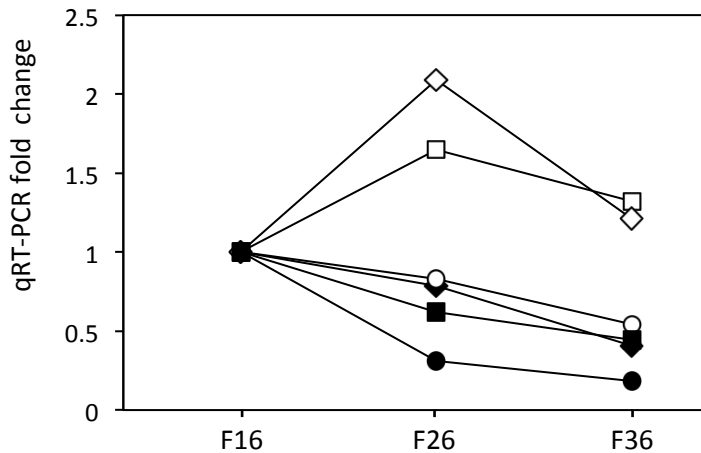

**Fig. S1.** Relative expression changes of *phaC1* determined by qRT-PCR using three primer sets for amplification and two inner control genes for quantification. Square, amplification of the central region (primers: phaC1-5'-Cent/phaC1-3'-Cent); diamond, amplification of the N-terminal region (phaC1-5'-N/phaC1-3'-N); circle, amplification of the C-terminal region (phaC1-5'-C/phaC1-3'-C). Open symbols, *bfr2* inner control; closed symbols, 16SrRNA inner control.

**Materials and Methods for qRT-PCR.**

The total RNA isolated for RNA-seq was used as templates. cDNA synthesis was performed using ReverTra Ace qPCR RT Master Mix (TOYOBO, Osaka, Japan) according to the manufacturer's recommendations. Primer sequences for real-time PCR were designed using Primer3 (<http://frodo.wi.mit.edu/>) and are listed in Table S4. Real-time PCR was performed using KOD SYBR qPCR Mix (TOYOBO, Osaka, Japan) with Thermal Cycler Dice Real Time System (Takara Bio, Otsu, Japan). The reaction conditions were: 2 min at 98 °C, 40 cycles × (10 s at 98 °C, 10 s at 60 °C, and 30 s at 68 °C). The gene expression levels of target regions were relatively quantified using following equation: Gene expression level =  $2^{Ct(\text{Inner control}) - Ct(\text{target region})}$ .

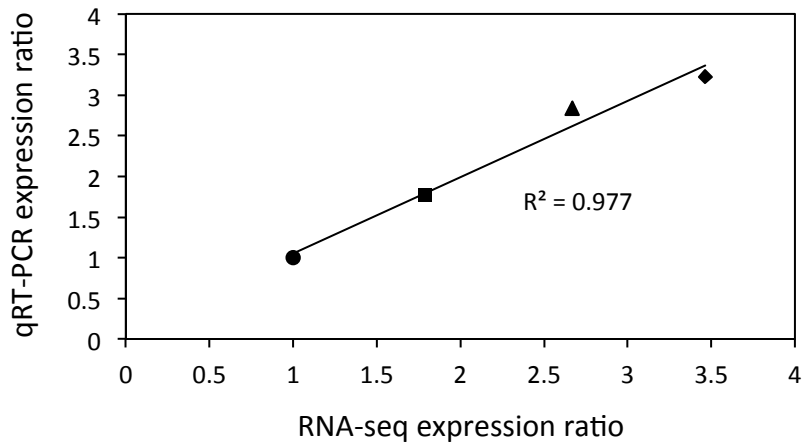

**Fig. S2.** Correlation of expression ratios from RNA-seq and qRT-PCR in F26. The best-fit linear regression curve is shown with the correlation coefficient ( $R^2$ ). Closed circle, *dapA1* (primers: *dapA1*-5'/*dapA1*-3'); closed square, *phaC1* (*phaC1*-5'-Cent/*phaC1*-3'-Cent); closed triangle, *cbbL* (*cbbL*-5'/*cbbL*-3'); closed diamond, *bfr2* (*bfr2*-5'/*bfr2*-3'). The primer sequences are listed in Table S4, and qRT-PCR was performed as described in the legend of Fig. S1.

Table S1. Highly transcribed genes in *R. eutropha* H16 during the growth on fructose.<sup>a</sup>

| Gene ID   | Gene name    | Product                                                                  | F16    | F26    | F36    | P value  |
|-----------|--------------|--------------------------------------------------------------------------|--------|--------|--------|----------|
| H16_A0148 |              | Hypothetical protein                                                     | 3103   | 47027  | 23518  | 9.42E-6  |
| H16_A0374 | <i>ipk</i>   | 4-diphosphocytidyl-2-C-methyl-D-erythritol kinase                        | 16166  | 23792  | 2798   | 4.66E-7  |
| H16_A0386 |              | Sigma54 (RpoN) modulation protein                                        | 22341  | 85644  | 51411  | 5.72E-4  |
| H16_A0472 |              | ABC transporter periplasmic protein                                      | 31321  | 7739   | 7906   | 2.22E-7  |
| H16_A0482 | <i>rplM</i>  | 50S ribosomal protein L13                                                | 60190  | 17355  | 4388   | 2.27E-7  |
| H16_A0483 | <i>rpsI</i>  | 30S ribosomal protein S9                                                 | 52746  | 10359  | 5047   | 2.14E-8  |
| H16_A0533 |              | Universal stress protein                                                 | 9457   | 20855  | 2059   | 6.41E-7  |
| H16_A0705 | <i>groES</i> | Co-chaperonin GroES                                                      | 33882  | 10834  | 1032   | 2.93E-6  |
| H16_A0706 | <i>groEL</i> | Chaperonin GroEL                                                         | 28093  | 6001   | 1324   | 3.62E-8  |
| H16_A0788 |              | Outer membrane protein or related peptidoglycan-associated (lipo)protein | 26634  | 37691  | 7459   | 1.01E-6  |
| H16_A0790 |              | Hypothetical protein                                                     | 23495  | 9595   | 6018   | 4.74E-7  |
| H16_A0798 | <i>rpsA</i>  | 30S ribosomal protein S1                                                 | 45516  | 16769  | 8736   | 1.72E-7  |
| H16_A0799 | <i>ihfB</i>  | Integration host factor subunit beta                                     | 27217  | 9100   | 10435  | 3.90E-6  |
| H16_A0814 | <i>fixA</i>  | Electron transfer flavoprotein beta-subunit                              | 10528  | 34930  | 3725   | 1.23E-8  |
| H16_A0817 | <i>dadA1</i> | D-amino acid dehydrogenase small subunit                                 | 3906   | 67927  | 22824  | 9.04E-8  |
| H16_A0894 | <i>rpsP</i>  | 30S ribosomal protein S16                                                | 22542  | 10196  | 3166   | 2.24E-6  |
| H16_A0895 | <i>rim</i>   | 16S rRNA-processing protein RimM                                         | 23590  | 6586   | 1772   | 1.24E-8  |
| H16_A0896 | <i>trmD</i>  | tRNA (guanine-N(1)-)-methyltransferase                                   | 21765  | 4433   | 1556   | 5.77E-8  |
| H16_A0897 | <i>rplS</i>  | 50S ribosomal protein L19                                                | 89234  | 9919   | 7550   | 1.16E-7  |
| H16_A0977 |              | Hypothetical protein                                                     | 32073  | 8589   | 1550   | 3.48E-7  |
| H16_A1066 |              | Hypothetical protein                                                     | 2689   | 61243  | 1864   | 2.04E-9  |
| H16_A1067 |              | Acyl-CoA dehydrogenase                                                   | 2264   | 29586  | 923    | 8.76E-8  |
| H16_A1340 | <i>infC</i>  | Translation initiation factor 3                                          | 34741  | 26550  | 6823   | 1.35E-7  |
| H16_A1341 | <i>rpmI</i>  | 50S ribosomal protein L35                                                | 145428 | 39660  | 12481  | 1.88E-5  |
| H16_A1342 | <i>rplT</i>  | 50S ribosomal protein L20                                                | 145403 | 34556  | 14861  | 1.45E-7  |
| H16_A1359 |              | Hypothetical protein                                                     | 13317  | 58595  | 8143   | 1.05E-7  |
| H16_A1381 | <i>phaP1</i> | Phasin (PHA-granule associated protein)                                  | 13550  | 78551  | 20363  | 7.99E-9  |
| H16_A1439 | <i>phaB1</i> | Acetylacetyl-CoA reductase                                               | 35196  | 24374  | 22457  | 2.06E-6  |
| H16_A1482 | <i>tig</i>   | Trigger factor                                                           | 21079  | 8960   | 2823   | 1.29E-9  |
| H16_A2054 | <i>tsf</i>   | Elongation factor Ts                                                     | 22557  | 2078   | 2299   | 7.06E-9  |
| H16_A2276 | <i>rplI</i>  | 50S ribosomal protein L9                                                 | 42805  | 6470   | 4977   | 1.93E-9  |
| H16_A2277 | <i>rpsR</i>  | 30S ribosomal protein S18                                                | 40871  | 6261   | 4114   | 2.04E-6  |
| H16_A2278 |              | Primosomal replication protein N                                         | 24600  | 4662   | 2948   | 1.55E-8  |
| H16_A2279 | <i>rpsF</i>  | 30S ribosomal protein S6                                                 | 38842  | 22167  | 5281   | 4.82E-8  |
| H16_A2306 | <i>infB</i>  | Translation initiation factor IF-2                                       | 22829  | 4034   | 2692   | 1.30E-8  |
| H16_A2307 | <i>nusA</i>  | Transcription elongation factor NusA                                     | 30394  | 8827   | 2475   | 6.63E-9  |
| H16_A2308 | <i>yhbC</i>  | Hypothetical protein                                                     | 19132  | 20280  | 1915   | 9.36E-8  |
| H16_A2314 |              | Hypothetical protein                                                     | 20219  | 1742   | 894    | 3.24E-8  |
| H16_A2354 | <i>purA1</i> | Adenylosuccinate synthetase                                              | 8521   | 21641  | 5856   | 2.36E-8  |
| H16_A2537 |              | Hypothetical protein                                                     | 8273   | 24129  | 159602 | 4.68E-6  |
| H16_A2549 | <i>efp2</i>  | Elongation factor P                                                      | 20069  | 13550  | 942    | 2.14E-6  |
| H16_A2562 | <i>rseA</i>  | Negative regulator of sigma24 activity                                   | 8169   | 11758  | 31593  | 3.43E-7  |
| H16_A2563 | <i>rpoE1</i> | RNA polymerase sigma factor RpoE                                         | 9104   | 29706  | 26389  | 2.22E-7  |
| H16_A2566 | <i>acpP</i>  | Acyl carrier protein                                                     | 60340  | 22958  | 10760  | 4.47E-5  |
| H16_A3035 | <i>rpmG</i>  | 50S ribosomal protein L33                                                | 23353  | 13958  | 1929   | 2.33E-6  |
| H16_A3053 | <i>clpS</i>  | ATP-dependent Clp protease adaptor protein ClpS                          | 7543   | 29340  | 13070  | 7.51E-7  |
| H16_A3178 |              | Histone H1-like protein (alanine/lysine-rich protein)                    | 44408  | 12231  | 17587  | 6.21E-7  |
| H16_A3251 | <i>rpmA</i>  | 50S ribosomal protein L27                                                | 62153  | 17279  | 8843   | 2.82E-8  |
| H16_A3252 | <i>rplU</i>  | 50S ribosomal protein L21                                                | 83506  | 31755  | 9204   | 6.33E-6  |
| H16_A3268 | <i>ftsZ</i>  | Cell division protein FtsZ                                               | 15593  | 12244  | 25472  | 5.78E-6  |
| H16_A3402 |              | Outer membrane protein (porin)                                           | 200977 | 128814 | 28550  | 4.41E-7  |
| H16_A3459 | <i>rpsD</i>  | 30S ribosomal protein S4                                                 | 21274  | 5308   | 1982   | 9.07E-8  |
| H16_A3460 | <i>rpsK</i>  | 30S ribosomal protein S11                                                | 28930  | 3613   | 4335   | 2.04E-10 |
| H16_A3461 | <i>rpsM</i>  | 30S ribosomal protein S13                                                | 38659  | 4179   | 4031   | 6.23E-7  |
| H16_A3462 | <i>rpmJ</i>  | 50S ribosomal protein L36                                                | 28941  | 3029   | 2529   | 5.69E-7  |
| H16_A3463 | <i>infA</i>  | Translation initiation factor IF-1                                       | 38214  | 2466   | 2293   | 1.01E-5  |
| H16_A3464 | <i>secY</i>  | Preprotein translocase subunit SecY                                      | 49712  | 2676   | 2801   | 5.48E-8  |
| H16_A3465 | <i>rplO</i>  | 50S ribosomal protein L15                                                | 42905  | 2713   | 3125   | 8.71E-7  |
| H16_A3466 | <i>rpmD</i>  | 50S ribosomal protein L30                                                | 46502  | 2721   | 2192   | 2.31E-7  |
| H16_A3467 | <i>rpsE</i>  | 30S ribosomal protein S5                                                 | 77635  | 4196   | 3899   | 1.72E-7  |
| H16_A3468 | <i>rplR</i>  | 50S ribosomal protein L18                                                | 52464  | 3079   | 2766   | 2.74E-7  |
| H16_A3469 | <i>rplF</i>  | 50S ribosomal protein L6                                                 | 81146  | 5593   | 3795   | 1.14E-8  |

|           |              |                                                                                         |        |       |       |          |
|-----------|--------------|-----------------------------------------------------------------------------------------|--------|-------|-------|----------|
| H16_A3470 | <i>rpsH</i>  | 30S ribosomal protein S8                                                                | 76860  | 5740  | 3306  | 4.22E-9  |
| H16_A3471 | <i>rpsN</i>  | 30S ribosomal protein S14                                                               | 63930  | 5362  | 3213  | 2.31E-7  |
| H16_A3472 | <i>rplE</i>  | 50S ribosomal protein L5                                                                | 84150  | 5639  | 2772  | 5.26E-7  |
| H16_A3473 | <i>rplX</i>  | 50S ribosomal protein L24                                                               | 88620  | 5517  | 3096  | 3.62E-8  |
| H16_A3474 | <i>rplN</i>  | 50S ribosomal protein L14                                                               | 72917  | 6804  | 3129  | 1.11E-9  |
| H16_A3475 | <i>rpsQ</i>  | 30S ribosomal protein S17                                                               | 62778  | 7206  | 7585  | 4.50E-6  |
| H16_A3476 | <i>rpmC</i>  | 50S ribosomal protein L29                                                               | 63388  | 6417  | 6725  | 1.14E-6  |
| H16_A3477 | <i>rplP</i>  | 50S ribosomal protein L16                                                               | 51564  | 5111  | 5606  | 5.69E-9  |
| H16_A3478 | <i>rpsC</i>  | 30S ribosomal protein S3                                                                | 44982  | 4500  | 4747  | 2.02E-9  |
| H16_A3479 | <i>rplV</i>  | 50S ribosomal protein L22                                                               | 57558  | 6548  | 5285  | 4.24E-8  |
| H16_A3480 | <i>rpsS</i>  | 30S ribosomal protein S19                                                               | 48297  | 5655  | 3279  | 4.43E-8  |
| H16_A3481 | <i>rplB</i>  | 50S ribosomal protein L2                                                                | 38478  | 5077  | 3613  | 2.41E-9  |
| H16_A3482 | <i>rplW</i>  | 50S ribosomal protein L23                                                               | 24611  | 4157  | 1629  | 3.17E-8  |
| H16_A3483 | <i>rplD</i>  | 50S ribosomal protein L4                                                                | 29386  | 5321  | 1823  | 7.03E-9  |
| H16_A3484 | <i>rplC</i>  | 50S ribosomal protein L3                                                                | 45412  | 18305 | 2761  | 4.88E-9  |
| H16_A3491 | <i>Tufa</i>  | Elongation factor Tu                                                                    | 56799  | 12188 | 3757  | 3.55E-8  |
| H16_A3493 | <i>rpsG</i>  | 30S ribosomal protein S7                                                                | 48519  | 6689  | 4815  | 4.45E-7  |
| H16_A3494 | <i>rpsL</i>  | 30S ribosomal protein S12                                                               | 29400  | 5059  | 2627  | 7.06E-8  |
| H16_A3498 | <i>rplL</i>  | 50S ribosomal protein L7/L12                                                            | 97749  | 2926  | 4332  | 7.91E-8  |
| H16_A3499 | <i>rplJ</i>  | 50S ribosomal protein L10                                                               | 117512 | 3245  | 5129  | 1.91E-9  |
| H16_A3500 | <i>rplA</i>  | 50S ribosomal protein L1                                                                | 41872  | 2903  | 2637  | 7.27E-9  |
| H16_A3501 | <i>rplK</i>  | 50S ribosomal protein L11                                                               | 41479  | 3140  | 2120  | 2.16E-6  |
| H16_A3502 | <i>nusG</i>  | Transcription antitermination protein NusG                                              | 24253  | 4158  | 1684  | 2.64E-9  |
| H16_A3503 | <i>secE</i>  | Preprotein translocase subunit SecE                                                     | 22400  | 4491  | 912   | 1.11E-6  |
| H16_A3505 | <i>tufB</i>  | Elongation factor Tu                                                                    | 69017  | 16690 | 4265  | 6.41E-9  |
| H16_A3636 | <i>atpC</i>  | F <sub>0</sub> F <sub>1</sub> ATP synthase subunit epsilon                              | 22135  | 3990  | 755   | 1.18E-6  |
| H16_A3637 | <i>atpD</i>  | F <sub>0</sub> F <sub>1</sub> ATP synthase subunit beta                                 | 27006  | 4370  | 846   | 1.09E-10 |
| H16_A3644 | <i>atpI</i>  | membrane-bound ATP synthase subunit, F <sub>1</sub> -F <sub>0</sub> -type proton-ATPase | 12781  | 20053 | 901   | 4.27E-8  |
| H16_A3684 | <i>hupB2</i> | HU family DNA-binding protein                                                           | 44354  | 8056  | 19061 | 7.17E-7  |
| H16_B0002 | -            | Cold-shock protein, DNA-binding                                                         | 31101  | 15436 | 45864 | 3.88E-4  |
| H16_B0181 | -            | Fimbriae associated protein                                                             | 36702  | 44610 | 19536 | 6.20E-6  |
| H16_B0182 | <i>cpaA2</i> | Flp pilus assembly protein, protease CpaA                                               | 20955  | 15717 | 4948  | 1.44E-6  |
| H16_B0469 | -            | Hypothetical protein                                                                    | 198    | 31699 | 676   | 1.93E-6  |
| H16_B0700 | <i>prkA</i>  | Serine protein kinase                                                                   | 1858   | 20900 | 71784 | 9.15E-6  |
| H16_B0701 | -            | Hypothetical protein                                                                    | 1398   | 15296 | 73979 | 1.79E-8  |
| H16_B1225 | -            | Hypothetical protein                                                                    | 1508   | 931   | 23583 | 5.60E-8  |
| H16_B1381 | -            | Hypothetical protein                                                                    | 725    | 24092 | 727   | 1.00E-7  |
| H16_B1581 | <i>metE</i>  | 5-methyltetrahydropteroyltriglutamate-homocysteine S-methyltransferase                  | 24722  | 9128  | 10651 | 1.17E-5  |
| H16_B1672 | -            | XRE family-like protein                                                                 | 8381   | 11922 | 30035 | 2.45E-5  |
| H16_B1724 | -            | Hypothetical protein                                                                    | 474    | 21652 | 9646  | 1.27E-6  |
| H16_B1929 | -            | Cold shock protein, DNA-binding                                                         | 9572   | 36143 | 3219  | 2.07E-7  |
| H16_B2205 | -            | Cold shock protein, DNA-binding                                                         | 125300 | 60528 | 53240 | 8.03E-5  |
| H16_B2553 | -            | Hypothetical protein                                                                    | 6749   | 32666 | 6321  | 1.06E-7  |
| H16_B2576 | -            | Hypothetical protein                                                                    | 1670   | 21884 | 5001  | 6.21E-7  |
| H16_B2577 | -            | Hypothetical protein                                                                    | 2097   | 34186 | 8757  | 3.09E-8  |
| PHG109    | -            | Putative ATPase                                                                         | 4493   | 25111 | 4353  | 7.79E-10 |
| PHG197    | -            | Hypothetical protein                                                                    | 4098   | 26036 | 2372  | 3.97E-6  |
| PHG200    | <i>flp</i>   | Nitric oxide dioxygenase                                                                | 25473  | 11576 | 1040  | 1.77E-6  |
| PHG202    | <i>phaP2</i> | Phasin                                                                                  | 29279  | 29219 | 2217  | 2.09E-6  |
| PHG228    | -            | Hypothetical protein                                                                    | 2662   | 39323 | 1120  | 1.39E-9  |

<sup>a</sup>The genes of which RPKM values were larger than 20,000 at least in one of the three phases on fructose were presented except for tRNA genes.

Table S2. Highly up-regulated genes in F26 to F16.<sup>a</sup>

| Gene ID   | Gene name    | Product                                                       | F16  | F26   | LOG2 ratio (F26/F16) | P value  |
|-----------|--------------|---------------------------------------------------------------|------|-------|----------------------|----------|
| H16_A1954 |              | Acyltransferase                                               | 18   | 5295  | 8.24                 | 1.22E-7  |
| H16_A1957 |              | Hypothetical protein                                          | 32   | 7203  | 7.81                 | 6.22E-10 |
| H16_A1956 |              | Carbon-nitrogen hydrolase                                     | 19   | 3973  | 7.71                 | 2.35E-7  |
| H16_A1950 |              | Hypothetical protein                                          | 36   | 6884  | 7.58                 | 7.02E-8  |
| H16_A1955 |              | Biotin synthase-related enzyme                                | 28   | 5144  | 7.55                 | 3.47E-9  |
| H16_B0934 | -            | Hypothetical protein                                          | 112  | 19084 | 7.41                 | 3.64E-9  |
| H16_B0469 | -            | Hypothetical protein                                          | 198  | 31699 | 7.32                 | 1.93E-6  |
| H16_B0933 | -            | Hypothetical protein                                          | 66   | 10436 | 7.32                 | 9.77E-6  |
| H16_A1953 |              | Selenophosphate synthetase-related protein                    | 23   | 2727  | 6.92                 | 2.33E-6  |
| H16_A1951 | <i>trkA2</i> | K <sup>+</sup> transport flavoprotein                         | 71   | 7228  | 6.67                 | 3.46E-8  |
| H16_A1949 | <i>sbm2</i>  | Methylmalonyl-CoA mutase                                      | 49   | 4198  | 6.44                 | 1.39E-6  |
| H16_B0776 | -            | Nitrate reductase [NADH]                                      | 58   | 4389  | 6.25                 | 2.77E-6  |
| H16_A0358 |              | ABC transporter permease                                      | 32   | 1953  | 5.93                 | 2.66E-9  |
| H16_B0777 | -            | Flavoprotein FAD oxidoreductase                               | 37   | 2225  | 5.93                 | 1.37E-6  |
| H16_A0357 |              | ABC transporter ATPase                                        | 75   | 4508  | 5.92                 | 5.58E-7  |
| H16_A1596 |              | Hypothetical protein                                          | 239  | 13315 | 5.80                 | 8.73E-8  |
| H16_B0779 | <i>nasD</i>  | Nitrite reductase, NAD(P)H-dependent, large subunit           | 55   | 3001  | 5.77                 | 2.39E-7  |
| H16_B0468 | -            | Putative arylsulfatase regulator                              | 116  | 5969  | 5.69                 | 4.65E-7  |
| H16_B0780 | <i>narK5</i> | Major facilitator superfamily transporter NNP family protein  | 24   | 1178  | 5.62                 | 2.92E-8  |
| H16_B1724 | -            | Hypothetical protein                                          | 474  | 21652 | 5.51                 | 1.27E-6  |
| H16_A2656 |              | Hypothetical protein                                          | 67   | 2835  | 5.41                 | 3.30E-5  |
| H16_B1158 | -            | Hypothetical protein                                          | 101  | 4239  | 5.39                 | 1.33E-5  |
| H16_A1597 |              | Hypothetical protein                                          | 114  | 4212  | 5.21                 | 1.65E-7  |
| H16_B0950 | -            | Hypothetical protein                                          | 60   | 2180  | 5.20                 | 2.71E-7  |
| H16_B2252 | -            | Hypothetical protein                                          | 140  | 5064  | 5.18                 | 1.07E-6  |
| H16_A2227 | <i>iclB</i>  | Isocitrate lyase                                              | 382  | 13129 | 5.10                 | 1.05E-11 |
| H16_B1381 | -            | Hypothetical protein                                          | 725  | 24092 | 5.05                 | 1.00E-7  |
| H16_B0326 | -            | LuxR family transcriptional regulator                         | 149  | 4506  | 4.92                 | 1.34E-6  |
| H16_B2253 | -            | Hypothetical protein                                          | 169  | 4937  | 4.87                 | 5.81E-6  |
| H16_B1149 | -            | Hypothetical protein                                          | 101  | 2928  | 4.86                 | 1.20E-5  |
| H16_A0073 |              | M20 family peptidase                                          | 228  | 6536  | 4.84                 | 3.16E-6  |
| H16_A1320 |              | GntR family transcriptional regulator                         | 162  | 4474  | 4.79                 | 1.21E-7  |
| H16_B1380 | <i>cyaA</i>  | AMP/GMP cyclase                                               | 79   | 2167  | 4.79                 | 4.00E-8  |
| H16_A0074 |              | AraC family transcriptional regulator                         | 77   | 2089  | 4.77                 | 1.44E-5  |
| H16_A2190 |              | Hypothetical protein                                          | 180  | 4853  | 4.76                 | 7.46E-5  |
| H16_B1969 | -            | Hypothetical protein                                          | 123  | 3267  | 4.74                 | 1.46E-5  |
| H16_B0952 | <i>ccmA2</i> | ABC transporter ATPase                                        | 58   | 1534  | 4.73                 | 1.19E-8  |
| H16_B0168 | -            | Putative multidrug resistance protein                         | 74   | 1942  | 4.71                 | 5.33E-6  |
| H16_B0100 | -            | Hypothetical protein                                          | 169  | 4420  | 4.71                 | 1.02E-4  |
| H16_B1150 | -            | Hypothetical protein                                          | 117  | 2905  | 4.63                 | 1.12E-5  |
| H16_A1066 |              | Hypothetical protein                                          | 2689 | 61243 | 4.51                 | 2.04E-9  |
| H16_B1161 | -            | TetR/AcrR family transcriptional regulator                    | 538  | 12218 | 4.51                 | 9.32E-9  |
| H16_B1382 | <i>clpC2</i> | ATP-dependent protease Clp, ATPase subunit                    | 46   | 1032  | 4.50                 | 5.96E-5  |
| H16_B1190 | -            | 3-hydroxyisobutyrate dehydrogenase                            | 41   | 919   | 4.50                 | 5.95E-4  |
| H16_B0948 | -            | NAD(FAD)-dependent dehydrogenase                              | 65   | 1456  | 4.50                 | 3.93E-7  |
| H16_B1189 | <i>crt</i>   | Enoyl-CoA hydratase                                           | 44   | 993   | 4.50                 | 1.23E-5  |
| H16_A0688 |              | Amidinotransferase                                            | 163  | 3651  | 4.49                 | 1.85E-4  |
| H16_B0467 | -            | Hypothetical protein                                          | 135  | 3025  | 4.49                 | 9.38E-8  |
| H16_B0951 | -            | Hemoglobin-like protein (Hmp)                                 | 110  | 2447  | 4.48                 | 2.74E-7  |
| H16_A0959 |              | Hypothetical protein                                          | 385  | 8558  | 4.48                 | 2.96E-6  |
| H16_B1968 | -            | Hypothetical protein                                          | 95   | 2089  | 4.47                 | 8.71E-7  |
| H16_B1028 | <i>cyoD3</i> | bo3-type chinol oxidase, subunit IV                           | 34   | 735   | 4.43                 | 7.17E-6  |
| H16_B0957 | <i>ccmG2</i> | Thiol-disulfide isomerase involved in cytochrome c biogenesis | 73   | 1557  | 4.42                 | 7.32E-4  |
| H16_B1024 | -            | Major facilitator transporter                                 | 37   | 790   | 4.42                 | 3.25E-5  |
| H16_A1976 | <i>copP1</i> | Putative copper uptake P-type ATPase                          | 64   | 1303  | 4.35                 | 7.63E-9  |
| PHG153    | -            | Hypothetical protein                                          | 135  | 2683  | 4.31                 | 2.45E-6  |
| H16_B1156 | -            | Hypothetical protein                                          | 366  | 7226  | 4.30                 | 1.34E-5  |
| H16_A2801 |              | MFS family transporter                                        | 107  | 2106  | 4.30                 | 5.29E-6  |
| H16_A0359 |              | ABC transporter periplasmic protein                           | 95   | 1859  | 4.29                 | 9.28E-6  |
| H16_B1027 | <i>cyoC3</i> | bo3-type chinol oxidase, subunit III                          | 41   | 798   | 4.28                 | 8.10E-6  |
| H16_B1536 | -            | Hypothetical protein                                          | 279  | 5315  | 4.25                 | 1.20E-4  |
| H16_A1853 |              | AraC family transcriptional regulator                         | 27   | 510   | 4.24                 | 3.31E-5  |
| H16_B1148 | -            | Acyl-CoA synthetase                                           | 188  | 3452  | 4.20                 | 1.73E-7  |

|           |              |                                                          |      |       |      |         |
|-----------|--------------|----------------------------------------------------------|------|-------|------|---------|
| H16_A2657 |              | Metal-dependent hydrolase                                | 65   | 1183  | 4.19 | 2.64E-6 |
| H16_B1383 | <i>cbbB</i>  | Formate dehydrogenase, alpha chain                       | 521  | 9385  | 4.17 | 2.66E-7 |
| H16_B0775 | -            | Extra-cytoplasmic solute receptor                        | 131  | 2331  | 4.16 | 3.26E-8 |
| H16_A0689 |              | Ornithine cyclodeaminase                                 | 237  | 4159  | 4.14 | 8.52E-5 |
| H16_B2145 | -            | Hypothetical protein                                     | 168  | 2932  | 4.13 | 1.98E-4 |
| H16_A1080 | <i>ureD</i>  | Urea amidohydrolase (urease) accessory protein UreD      | 265  | 4606  | 4.12 | 5.16E-6 |
| H16_A0165 |              | MerR family transcriptional regulator                    | 3906 | 67927 | 4.12 | 9.04E-8 |
| H16_A0817 | <i>dadA1</i> | D-amino acid dehydrogenase small subunit                 | 66   | 1138  | 4.12 | 5.61E-5 |
| H16_B1431 | -            | Universal stress protein                                 | 95   | 1639  | 4.12 | 3.97E-7 |
| H16_A2781 |              | Epimerase, PhzC/PhzF-like protein                        | 85   | 1465  | 4.12 | 1.62E-5 |
| H16_B0060 | -            | Hypothetical protein                                     | 222  | 3835  | 4.11 | 2.14E-5 |
| H16_A0164 |              | Zn-dependent hydrolase including glyoxylase              | 357  | 6025  | 4.08 | 1.64E-6 |
| H16_A3357 | <i>acrA6</i> | Cation/multidrug efflux system, mebrane-fusion component | 89   | 1469  | 4.05 | 1.26E-5 |
| H16_B1549 | -            | Hypothetical protein                                     | 115  | 1895  | 4.05 | 3.26E-4 |
| H16_B2577 | -            | Hypothetical protein                                     | 2097 | 34186 | 4.03 | 3.09E-8 |
| H16_A2673 |              | Hypothetical protein                                     | 1205 | 19472 | 4.01 | 1.22E-6 |
| H16_A1079 |              | ABC transporter ATPase                                   | 138  | 2205  | 4.00 | 1.77E-5 |

<sup>a</sup>The RNA levels comparison with F26 to F16 were log-transformed to base 2 and the genes which the value is over 4 were shown. The genes which RPKM value (average of two runs) is over 500 in F26 are listed.

Table S3. Highly down-regulated genes in F26 to F16.<sup>a</sup>

| Gene ID   | Gene name    | Product                                                           | F16    | F26  | LOG2 ratio (F26/F16) | P value |
|-----------|--------------|-------------------------------------------------------------------|--------|------|----------------------|---------|
| H16_B0263 | <i>flgD</i>  | Flagellar basal body rod modification protein                     | 850    | 6    | -7.27                | 1.56E-6 |
| H16_B2369 | <i>fliG</i>  | Flagellar motor switch protein G                                  | 614    | 6    | -6.80                | 7.78E-7 |
| H16_B1810 | -            | ABC transporter ATPase                                            | 1138   | 17   | -6.11                | 3.55E-6 |
| H16_B1499 | <i>frcC</i>  | ABC transporter permease                                          | 5862   | 90   | -6.03                | 4.40E-7 |
| H16_B0233 | -            | Methyl-accepting chemotaxis protein                               | 2514   | 39   | -6.03                | 4.48E-6 |
| H16_A2384 |              | Extra-cytoplasmic solute receptor                                 | 2568   | 44   | -5.88                | 4.29E-6 |
| H16_B2367 | <i>fliE</i>  | Flagellar hook-basal body complex protein                         | 553    | 10   | -5.79                | 7.03E-6 |
| H16_B2183 | <i>copC</i>  | Copper resistance protein C                                       | 4817   | 91   | -5.73                | 5.97E-6 |
| PHG249    | <i>nosF</i>  | Putative copper ATP-binding ABC transporter                       | 1038   | 20   | -5.70                | 1.42E-7 |
| H16_B2122 | <i>tar2</i>  | Methyl-accepting chemotaxis protein                               | 1145   | 23   | -5.67                | 6.14E-9 |
| H16_A3669 | <i>copZ</i>  | Copper chaperone, heavy metal ion binding                         | 8485   | 171  | -5.64                | 5.59E-5 |
| H16_B2182 | <i>copD</i>  | Copper resistance protein D, transmembrane component              | 5641   | 116  | -5.61                | 2.70E-9 |
| PHG250    | <i>nosD</i>  | Putative copper binding periplasmic protein                       | 1804   | 38   | -5.59                | 7.31E-6 |
| H16_A2382 |              | ABC transporter ATPase                                            | 1739   | 38   | -5.52                | 6.87E-8 |
| H16_B2184 | <i>copB</i>  | Copper resistance protein B, copper extruder                      | 11823  | 259  | -5.52                | 2.26E-7 |
| H16_B0232 | -            | Methyl-accepting chemotaxis protein                               | 1642   | 36   | -5.51                | 3.35E-6 |
| H16_B0268 | <i>flgI</i>  | Flagellar basal body P-ring protein                               | 698    | 16   | -5.49                | 1.96E-8 |
| H16_B1809 | -            | ABC transporter permease                                          | 531    | 12   | -5.47                | 5.75E-6 |
| H16_B0244 | <i>cheY1</i> | Chemotaxis response regulator                                     | 1503   | 35   | -5.44                | 7.33E-7 |
| PHG334    | <i>pri</i>   | Putative primase                                                  | 700    | 17   | -5.41                | 2.10E-4 |
| PHG349    | <i>pilO</i>  | Putative component of type II secretion apparatus                 | 750    | 18   | -5.38                | 1.99E-5 |
| H16_B1501 | <i>zwf2</i>  | Glucose-6-phosphate 1-dehydrogenase                               | 2828   | 75   | -5.25                | 3.17E-7 |
| H16_B1502 | <i>pgi</i>   | Glucose-6-phosphate isomerase                                     | 4466   | 123  | -5.18                | 2.16E-5 |
| H16_A3499 | <i>rplJ</i>  | 50S ribosomal protein L10                                         | 2101   | 58   | -5.18                | 9.04E-7 |
| PHG289    | -            | Hypothetical protein                                              | 117512 | 3245 | -5.18                | 1.91E-9 |
| H16_A2381 |              | ABC transporter permease                                          | 3442   | 97   | -5.16                | 1.91E-7 |
| H16_B1811 | -            | Hypothetical protein                                              | 1099   | 31   | -5.15                | 1.04E-5 |
| PHG288    | -            | Hypothetical protein                                              | 794    | 23   | -5.14                | 9.23E-8 |
| H16_B0234 | -            | Hypothetical protein                                              | 1855   | 54   | -5.12                | 4.30E-6 |
| H16_B0271 | <i>flgL</i>  | Flagellar hook-associated protein FlgL                            | 1005   | 30   | -5.07                | 2.88E-8 |
| H16_A3498 | <i>rplL</i>  | 50S ribosomal protein L7/L12                                      | 97749  | 2926 | -5.06                | 7.91E-8 |
| H16_B2181 | -            | Hypothetical protein                                              | 6095   | 186  | -5.04                | 1.22E-7 |
| H16_A0040 |              | Hypothetical protein                                              | 638    | 20   | -5.03                | 6.65E-4 |
| H16_B0565 | <i>fliN</i>  | Flagellar motor switch protein/type III secretory pathway protein | 1068   | 34   | -4.99                | 2.72E-5 |
| PHG348    | <i>pilQ</i>  | Putative traffic warden ATPase                                    | 715    | 24   | -4.93                | 1.81E-5 |
| PHG351    | <i>pilN</i>  | Putative component of type II secretion apparatus                 | 582    | 20   | -4.90                | 1.66E-7 |
| H16_B1933 | -            | Methyl-accepting chemotaxis protein                               | 3871   | 134  | -4.86                | 5.13E-6 |
| H16_B1498 | <i>frcA</i>  | ABC transporter ATPase                                            | 1156   | 40   | -4.85                | 2.41E-7 |
| H16_B1500 | <i>frcB</i>  | ABC transporter periplasmic protein                               | 2713   | 98   | -4.80                | 5.84E-6 |
| H16_B0243 | <i>cheB1</i> | Chemotaxis-specific methylesterase                                | 635    | 23   | -4.79                | 1.04E-5 |
| H16_B0264 | <i>flgE</i>  | Flagellar hook protein FlgE                                       | 902    | 33   | -4.77                | 5.94E-6 |
| H16_A3602 | <i>pyk2</i>  | Pyruvate kinase                                                   | 711    | 27   | -4.72                | 9.50E-6 |
| H16_A2385 | <i>hmgL1</i> | Hydroxymethylglutaryl-CoA lyase                                   | 1815   | 69   | -4.72                | 2.29E-4 |
| H16_A3668 | <i>copP2</i> | Putative copper uptake P-type ATPase                              | 8340   | 320  | -4.70                | 1.56E-5 |
| H16_B1503 | <i>frcK</i>  | Fructokinase                                                      | 3304   | 131  | -4.66                | 2.19E-5 |
| H16_B2185 | <i>copA</i>  | Copper resistance protein A, multi-copper oxidase                 | 10580  | 427  | -4.63                | 2.12E-6 |
| PHG251    | <i>nosR</i>  | Putative transcription regulator                                  | 1400   | 59   | -4.57                | 1.79E-7 |
| H16_B2362 | <i>fliD</i>  | Flagellar hook-associated protein 2                               | 1600   | 70   | -4.51                | 2.86E-8 |
| H16_B0231 | <i>cheW3</i> | Chemotaxis protein                                                | 1203   | 57   | -4.40                | 1.09E-5 |
| H16_A2380 |              | Signal transduction histidine kinase                              | 6439   | 311  | -4.37                | 1.14E-9 |
| H16_B2360 | <i>fliC</i>  | Flagellin                                                         | 549    | 27   | -4.37                | 4.72E-6 |
| H16_A3384 |              | Hypothetical protein                                              | 1659   | 83   | -4.32                | 5.76E-6 |
| H16_B0245 | <i>cheZ1</i> | Chemotaxis regulator CheZ                                         | 549    | 28   | -4.32                | 1.61E-5 |
| H16_B0270 | <i>flgK</i>  | Flagellar hook-associated protein FlgK                            | 539    | 27   | -4.32                | 1.23E-5 |
| PHG355    | <i>trbN</i>  | Putative lytic transglycosylase                                   | 774    | 39   | -4.31                | 4.19E-7 |
| PHG292    | -            | Hypothetical protein                                              | 1673   | 86   | -4.29                | 1.01E-5 |
| PHG350    | -            | Hypothetical protein                                              | 542    | 28   | -4.27                | 2.67E-5 |
| H16_B2180 | -            | Hypothetical protein                                              | 2501   | 132  | -4.25                | 1.36E-4 |
| H16_B0258 | <i>flgN</i>  | Flagellar biosynthesis protein                                    | 547    | 29   | -4.24                | 3.24E-7 |
| PHG356    | <i>trbI</i>  | Putative channel-forming protein                                  | 1121   | 60   | -4.24                | 1.98E-7 |
| H16_B0239 | <i>cheA1</i> | Chemotaxis protein histidine kinase                               | 1140   | 61   | -4.22                | 1.21E-8 |
| H16_A2383 |              | ABC-type transporter, periplasmic component                       | 49712  | 2676 | -4.22                | 5.48E-8 |
| H16_A3464 | <i>secY</i>  | Preprotein translocase subunit SecY                               | 4727   | 255  | -4.22                | 1.66E-6 |

|           |              |                                                                         |       |      |       |         |
|-----------|--------------|-------------------------------------------------------------------------|-------|------|-------|---------|
| H16_A3467 | <i>rpsE</i>  | 30S ribosomal protein S5                                                | 77635 | 4196 | -4.21 | 1.72E-7 |
| H16_A1377 | <i>pdhL</i>  | Dihydrolipoamide dehydrogenase (E3) component of pyruvate dehydrogenase | 15507 | 849  | -4.19 | 5.50E-8 |
| H16_B2434 | -            | Hypothetical protein                                                    | 5194  | 291  | -4.16 | 7.90E-6 |
| H16_A3466 | <i>rpmD</i>  | 50S ribosomal protein L30                                               | 46502 | 2721 | -4.10 | 2.31E-7 |
| H16_A3468 | <i>rplR</i>  | 50S ribosomal protein L18                                               | 52464 | 3079 | -4.09 | 2.74E-7 |
| H16_B0240 | <i>cheW1</i> | Chemotaxis protein                                                      | 1595  | 96   | -4.06 | 1.93E-5 |
| H16_A1376 | <i>hslV</i>  | ATP-dependent protease HslVU (ClpYQ), peptidase subunit                 | 12023 | 731  | -4.04 | 1.77E-6 |
| PHG352    | <i>bfpG</i>  | Putative BfpG-like protein                                              | 539   | 33   | -4.03 | 2.36E-4 |
| H16_A3473 | <i>rplX</i>  | 50S ribosomal protein L24                                               | 88620 | 5517 | -4.01 | 3.62E-8 |

<sup>a</sup>The RNA levels comparison with F26 to F16 were log-transformed to base 2 and the genes which the value is under -4 were shown. The genes which RPKM value (average of two run) is over 500 in F16 were listed.



Table S4. Primers used in this study.

| Primer        | Sequence (5'-3')                        | Restriction site <sup>a</sup> or additional information |
|---------------|-----------------------------------------|---------------------------------------------------------|
| cbbLSc-up5'   | CCCA <u>AAGCTT</u> ATCAGCCCCCGTACTCCCTC | HindIII                                                 |
| cbbLSc-up3'   | ACTCGAAAGAAGCCCACCCACATAAGGTAAA         |                                                         |
| cbbLSc-down5' | TGGGTGGGCTTCTTTCGAGTCGGATGCT            |                                                         |
| cbbLSc-down3' | GGA <u>ATTC</u> GATGGTGGTCAGGGTATGGT    | EcoRI                                                   |
| cbbLSp-up5'   | CCCA <u>AAGCTT</u> TATTCCGCCGTGTGTTCCA  | HindIII                                                 |
| cbbLSp-up3'   | GTCAGGAAATCTGCGTTGATGCAAAGATA           |                                                         |
| cbbLSp-down5' | ATCAACGCAGATTTCTGACTGTGCCATCC           |                                                         |
| cbbLSp-down3' | GGA <u>ATTC</u> CAGGTGAGCGGTTTCGGTAT    | EcoRI                                                   |
| phaC1-5'-Cent | GTGGTGGAGCAGGGACATAC                    | For amplification of 793-953 region of <i>phaC1</i>     |
| phaC1-3'-Cent | AAGCCGAGCACGTTGATCTT                    |                                                         |
| phaC1-5'-N    | CCGCGTTCTACCTGCTCAA                     | For amplification of 350-576 region of <i>phaC1</i>     |
| phaC1-3'-N    | GCGTGCAGGTCTTCCATCA                     |                                                         |
| phaC1-5'-C    | CGTTCGACCTGCTGTTCTGG                    | For amplification of 1256-1455 region of <i>phaC1</i>   |
| phaC1-3'-C    | CCACGGCACGATATGGTCTT                    |                                                         |
| 16SrRNA-5'    | CGGAATTACTGGGCGTAAAG                    | Ref <sup>b</sup>                                        |
| 16SrRNA-3'    | ACGCATTTCACTGCTACACG                    |                                                         |
| bfr2-5'       | CGCGATCAACCAGTATTTCC                    |                                                         |
| bfr2-3'       | GTCTGCTCCAGCTTCAGGTC                    |                                                         |
| cbbLc-5'      | CGCTTCCTGTTTCGTGATGG                    |                                                         |
| cbbLc-3'      | GGTGCAGGATCATGTCGTTCT                   |                                                         |
| dapA1-5'      | CGACCCAGGAAGGCATGTA                     |                                                         |
| dapA1-3'      | GCCGCTGTAGATGGCAA                       |                                                         |

<sup>a</sup> Indicated by underlining in the primer sequence.

<sup>b</sup> Lawrence AG, Schoenheit J, He A, Tian J, Liu P, Stubbe J, Sinskey AJ: Transcriptional analysis of *Ralstonia eutropha* genes related to poly-(R)-3-hydroxybutyrate homeostasis during batch fermentation. *Appl Microbiol Biotechnol* 2005, 68:663–672.
